# Supplementary material for: Orientation effects on the nanoscale adsorption behavior of bone morphogenetic protein-2 on hydrophilic silicon dioxide
Source: Royal Society of Chemistry journal article supplement (doi:10.1039/c8ra09165j), 2019-01-01
Supplement: c8ra09165j1.pdf [file c8ra09165j1.pdf]

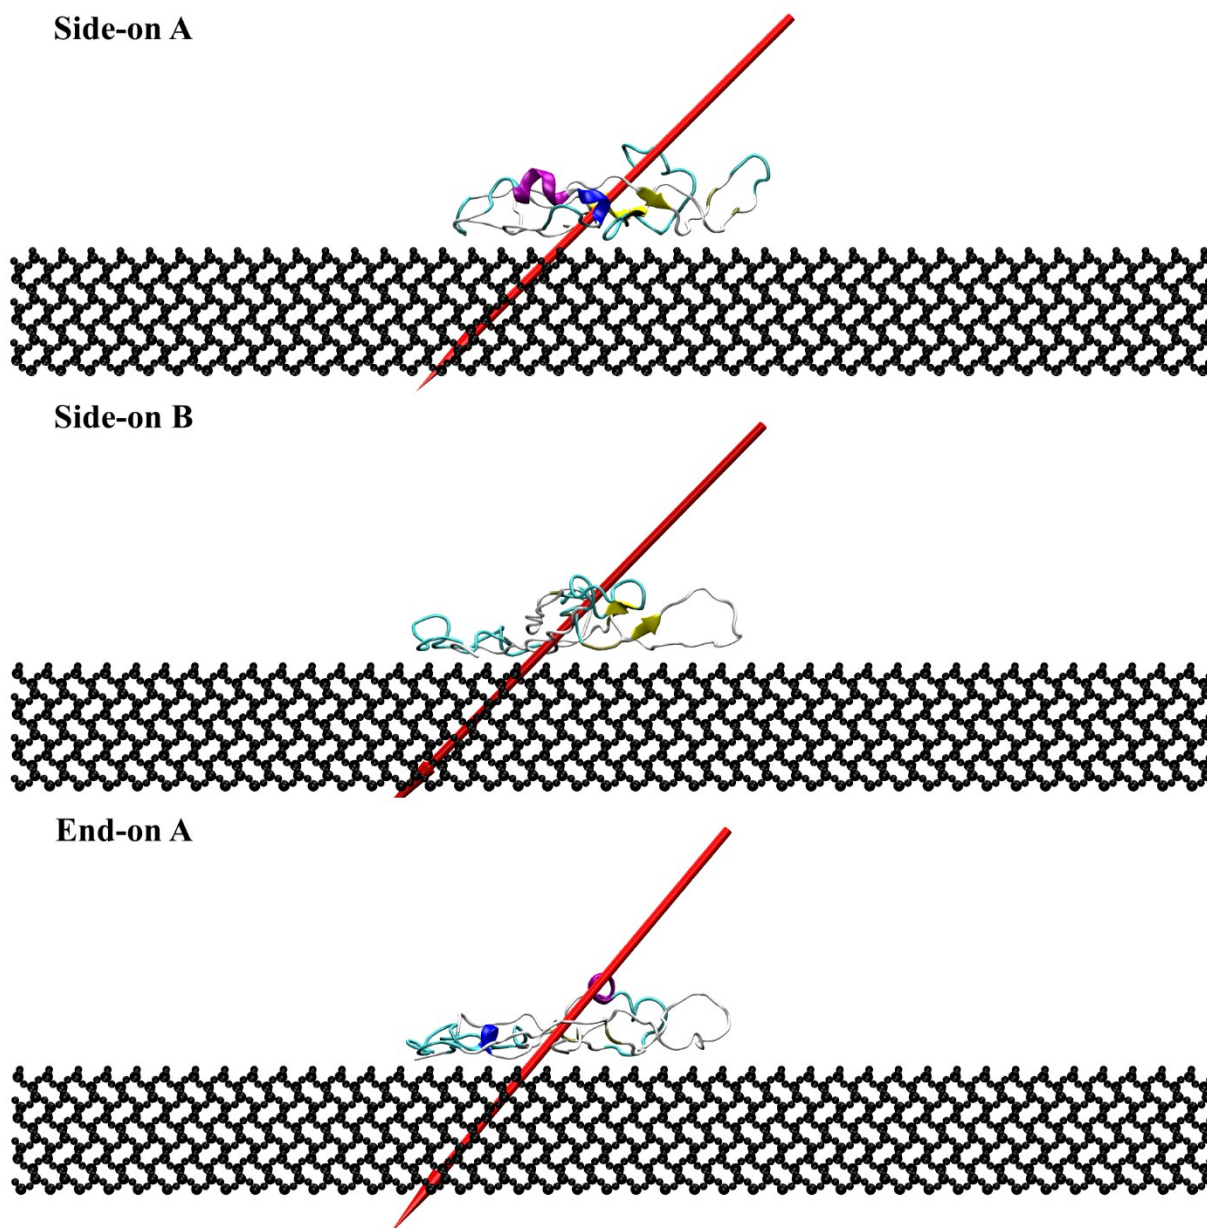

Final orientations of BMP-2 based on their initial configurations. The end-on B configuration has been explained within the paper. The dipole moments are at 45° with respect to the substrate. However, each configuration had different secondary structure content at the final adsorbed state as shown in Table 1.
